# Supplementary material
Source: ML conference proceedings conference paper supplement (https://proceedings.neurips.cc/paper_files/paper/2018/hash/7e3b7a5bafcb0fa8e8dfe3ea6aca9186-Abstract.html)
Supplement: Supplementary file [file 7e3b7a5bafcb0fa8e8dfe3ea6aca9186-Supplemental.zip]

# Supplementary Document

## Non-Ergodic Alternating Proximal Augmented Lagrangian Algorithms with Optimal Rates

### A Properties of Augmented Lagrangian Function and Optimality Bounds

In this section, we investigate some properties of the augmented Lagrangian function  $\mathcal{L}_\rho$  in (5).

#### 1.1 Properties of the augmented Lagrangian function

Let us recall the augmented Lagrangian function  $\mathcal{L}_\rho$  in (5) associated with problem (1). To investigate its properties, we define the following two functions:

$$\psi_\rho(u, \lambda) := \frac{\rho}{2} \|u\|^2 - \langle \lambda, u \rangle, \quad \text{and} \quad \phi_\rho(z, \lambda) := \psi_\rho(Ax + By - c, \lambda). \quad (12)$$

Since  $\nabla_u \psi_\rho(u, \hat{\lambda}) = \rho u - \hat{\lambda}$  is  $\rho$ -Lipschitz continuous in  $u$  for any given  $\hat{\lambda} \in \mathbb{R}^n$ , it is obvious that

$$\begin{aligned} \psi_\rho(u_+, \hat{\lambda}) &\leq \psi_\rho(u, \hat{\lambda}) + \langle \nabla_u \psi_\rho(u, \hat{\lambda}), u_+ - u \rangle + \frac{\rho}{2} \|u_+ - u\|^2 \\ \psi_\rho(u_+, \hat{\lambda}) &\geq \psi_\rho(u, \hat{\lambda}) + \langle \nabla_u \psi_\rho(u, \hat{\lambda}), u_+ - u \rangle + \frac{1}{2\rho} \|\nabla_u \psi_\rho(u_+, \hat{\lambda}) - \nabla_u \psi_\rho(u, \hat{\lambda})\|^2, \end{aligned} \quad (13)$$

for any  $u_+, u \in \mathbb{R}^n$ , see, e.g., [18].

Given  $\hat{z}^{k+1} := (x^{k+1}, \hat{y}^k) \in \text{dom}(F)$  and  $\hat{\lambda}^k \in \mathbb{R}^n$ , we also define the following linear function:

$$\ell_\rho^k(z) := \phi_\rho(\hat{z}^{k+1}, \hat{\lambda}^k) + \langle \nabla_x \phi_\rho(\hat{z}^{k+1}, \hat{\lambda}^k), x - x^{k+1} \rangle + \langle \nabla_y \phi_\rho(\hat{z}^{k+1}, \hat{\lambda}^k), y - \hat{y}^k \rangle. \quad (14)$$

If we define  $s^k := Ax^k + By^k - c$  and  $\hat{s}^{k+1} := Ax^{k+1} + B\hat{y}^k - c$ , then using the definition of  $\ell_\rho^k$  and  $\phi_\rho$ , we can easily show that

$$\begin{aligned} \ell_\rho^k(z) &= \phi_\rho(z, \hat{\lambda}^k) - \frac{\rho}{2} \|A(x - x^{k+1}) + B(y - \hat{y}^k)\|^2, \quad \forall z \in \text{dom}(F), \\ \ell_\rho^k(z^*) &= -\frac{\rho}{2} \|\hat{s}^{k+1}\|^2 \quad \text{and} \quad \ell_\rho^k(z^k) = \phi_\rho(z^k, \hat{\lambda}^k) - \frac{\rho}{2} \|s^k - \hat{s}^{k+1}\|^2, \end{aligned} \quad (15)$$

where  $z^* \in \mathcal{Z}^*$  is any solution of (1).

For any matrix  $B := [B_1, \dots, B_m]$  concatenated from  $m$  matrices  $B_i$  for  $i = 1, \dots, m$ , we define  $L_B := \|B\|^2$  and  $\bar{L}_B := m \cdot \max \{\|B_i\|^2 \mid 1 \leq i \leq m\}$ , where  $\|B\|$  and  $\|B_i\|$  is the operator norms of  $B$  and  $B_i$ , respectively. For any  $d = [d_1, \dots, d_m] \in \mathbb{R}^{\hat{p}}$ , we can easily show that

$$\|Bd\|^2 = \left\| \sum_{i=1}^m B_i d_i \right\|^2 \leq \|B\|^2 \|d\|^2 \leq m \sum_{i=1}^m \|B_i\|^2 \|d_i\|^2 \leq \bar{L}_B \|d\|^2. \quad (16)$$

By the definition of  $\phi_\rho$ , using (14), (15), and (16), for any  $(x, y) \in \text{dom}(F)$ ,  $\hat{y} \in \text{dom}(g)$ , and  $\hat{\lambda} \in \mathbb{R}^n$ , we can derive

$$\phi_\rho(x, y, \hat{\lambda}) - \phi_\rho(x, \hat{y}, \hat{\lambda}) - \langle \nabla_y \phi_\rho(x, \hat{y}, \hat{\lambda}), y - \hat{y} \rangle = \frac{\rho}{2} \|B(y - \hat{y})\|^2.$$

Hence, by (16), we can show that

$$\phi_\rho(x, y, \hat{\lambda}) - \phi_\rho(x, \hat{y}, \hat{\lambda}) - \langle \nabla_y \phi_\rho(x, \hat{y}, \hat{\lambda}), y - \hat{y} \rangle \leq \frac{\rho \bar{L}_B}{2} \|y - \hat{y}\|^2 \leq \frac{\rho \bar{L}_B}{2} \|y - \hat{y}\|^2. \quad (17)$$

#### 1.2 The proof of Lemma 2.1: Approximate optimal solutions of (1)

For any  $z \in \text{dom}(F)$ , we have  $F^* = \mathcal{L}(z^*, \lambda^*) \leq \mathcal{L}(z, \lambda^*) = F(z) - \langle \lambda^*, Ax + By - c \rangle$ . Using the definition of  $S_\rho(\cdot)$ , we obtain

$$S_\rho(z, \lambda) + \langle \lambda, Ax + By - c \rangle - \frac{\rho}{2} \|Ax + By - c\|^2 = F(z) - F(z^*) \geq \langle \lambda^*, Ax + By - c \rangle. \quad (18)$$

This inequality implies

$$\frac{\rho}{2} \|Ax + By - c\|^2 - \|\lambda - \lambda^*\| \|Ax + By - c\| - S_\rho(z, \lambda) \leq 0, \quad (19)$$

which leads to

$$\begin{aligned} 2\rho S_\rho(z, \lambda) + \|\lambda - \lambda^*\|^2 &\geq \rho^2 \|Ax + By - c\|^2 - 2\rho \|\lambda - \lambda^*\| \|Ax + By - c\| + \|\lambda - \lambda^*\|^2 \\ &= [\rho \|Ax + By - c\| - \|\lambda - \lambda^*\|]^2 \geq 0. \end{aligned}$$

From from (19), we also have  $\|Ax + By - c\| \leq \frac{1}{\rho} \left[ \|\lambda - \lambda^*\| + \sqrt{\|\lambda - \lambda^*\|^2 + 2\rho S_\rho(z, \lambda)} \right]$  by solving a quadratic inequation. This is the second inequality of (6).

Next, from (18), we have

$$\begin{aligned} F(z) - F^* &\leq S_\rho(z, \lambda) - \frac{\rho}{2} \|Ax + By - c\|^2 + \|\lambda\| \|Ax + By - c\| \\ &\leq S_\rho(z, \lambda) - \frac{\rho}{2} \left[ \|Ax + By - c\| - \frac{\|\lambda\|}{\rho} \right]^2 + \frac{\|\lambda\|^2}{2\rho} \\ &\leq S_\rho(z, \lambda) + \frac{\|\lambda\|^2}{2\rho}. \end{aligned}$$

Using the Cauchy-Schwarz inequality, it follows from  $F^* \leq F(z) - \langle \lambda^*, Ax + By - c \rangle$  that  $-\|\lambda^*\| \|Ax + By - c\| \leq F(z) - F^*$ . Combining these two inequalities and the second estimate of (6), we obtain the first estimate of (6).  $\square$

## B Convergence analysis of Algorithm 1

Lemma B.1 and Lemma B.2 below are key to analyze the convergence of Algorithm 1

**Lemma B.1.** Assume that  $\mathcal{L}_\rho$  is defined by (5), and  $\ell_{\rho_k}^k$  is defined by (14). Let  $z^{k+1}$  be computed by Algorithm 1. Then, for any  $z \in \text{dom}(F)$ , we have

$$\begin{aligned} \mathcal{L}_{\rho_k}(z^{k+1}, \hat{\lambda}^k) &\leq F(z) + \ell_{\rho_k}^k(z) + \gamma_k \langle x^{k+1} - \hat{x}^k, x - \hat{x}^k \rangle - \gamma_k \|x^{k+1} - \hat{x}^k\|^2 \\ &\quad + \beta_k \langle y^{k+1} - \hat{y}^k, y - \hat{y}^k \rangle - \frac{(2\beta_k - \rho_k L_B)}{2} \|y^{k+1} - \hat{y}^k\|^2. \end{aligned} \quad (20)$$

*Proof.* Using (17) with  $\rho = \rho_k$ ,  $(x, y) = (x^{k+1}, y^{k+1}) = z^{k+1}$ ,  $(x, \hat{y}) = (x^{k+1}, \hat{y}^k) = \hat{z}^{k+1}$ , and  $\hat{\lambda} = \hat{\lambda}^k$ , we have

$$\phi_{\rho_k}(z^{k+1}, \hat{\lambda}^k) \leq \phi_{\rho_k}(\hat{z}^{k+1}, \hat{\lambda}^k) + \langle \nabla_y \phi_{\rho_k}(\hat{z}^{k+1}, \hat{\lambda}^k), y^{k+1} - \hat{y}^k \rangle + \frac{\rho_k L_B}{2} \|y^{k+1} - \hat{y}^k\|^2. \quad (21)$$

Next, using again  $\phi_\rho$  from (12), we can write down the optimality condition of the  $x$ -subproblem at Step 5 and the  $y_i$ -subproblem at Step 6 of Algorithm 1 as follows:

$$\begin{cases} 0 &= \nabla f(x^{k+1}) + \nabla_x \phi_{\rho_k}(\hat{z}^{k+1}, \hat{\lambda}^k) + \gamma_k(x^{k+1} - \hat{x}^k), & \nabla f(x^{k+1}) \in \partial f(x^{k+1}), \\ 0 &= \nabla g_i(y_i^{k+1}) + \nabla_{y_i} \phi_{\rho_k}(\hat{z}^{k+1}, \hat{\lambda}^k) + \beta_k(y_i^{k+1} - \hat{y}_i^k), & \nabla g_i(y_i^{k+1}) \in \partial g_i(y_i^{k+1}). \end{cases} \quad (22)$$

Using the convexity of  $f$  and  $g$ , for any  $x \in \text{dom}(f)$  and  $y \in \text{dom}(g)$ , we have

$$\begin{aligned} f(x^{k+1}) &\leq f(x) + \langle \nabla f(x^{k+1}), x^{k+1} - x \rangle, & \nabla f(x^{k+1}) \in \partial f(x^{k+1}), \\ g(y^{k+1}) &\leq g(y) + \langle \nabla g(y^{k+1}), y^{k+1} - y \rangle, & \nabla g(y^{k+1}) \in \partial g(y^{k+1}). \end{aligned} \quad (23)$$

Combining (21), (22), and (23), and then using the definition (5) of  $\mathcal{L}_\rho$ , for any  $z = (x, y) \in \text{dom}(F)$ , we can derive that

$$\begin{aligned} \mathcal{L}_{\rho_k}(z^{k+1}, \hat{\lambda}^k) &= f(x^{k+1}) + g(y^{k+1}) + \phi_{\rho_k}(z^{k+1}, \hat{\lambda}^k) \\ &\stackrel{(21), (23)}{\leq} f(x) + \langle \nabla f(x^{k+1}), x^{k+1} - x \rangle + g(y) + \langle \nabla g(y^{k+1}), y^{k+1} - y \rangle \\ &\quad + \phi_{\rho_k}(\hat{z}^{k+1}, \hat{\lambda}^k) + \langle \nabla_y \phi_{\rho_k}(\hat{z}^{k+1}, \hat{\lambda}^k), y^{k+1} - \hat{y}^k \rangle + \frac{\rho_k L_B}{2} \|y^{k+1} - \hat{y}^k\|^2 \\ &\stackrel{(22)}{\leq} F(z) + \phi_{\rho_k}(\hat{z}^{k+1}, \hat{\lambda}^k) + \langle \nabla_x \phi_{\rho_k}(\hat{z}^{k+1}, \hat{\lambda}^k), x - x^{k+1} \rangle + \langle \nabla_y \phi_{\rho_k}(\hat{z}^{k+1}, \hat{\lambda}^k), y - \hat{y}^k \rangle \\ &\quad + \gamma_k \langle \hat{x}^k - x^{k+1}, x^{k+1} - x \rangle + \beta_k \langle \hat{y}^k - y^{k+1}, y^{k+1} - y \rangle + \frac{\rho_k L_B}{2} \|y^{k+1} - \hat{y}^k\|^2 \\ &\stackrel{(14)}{=} F(z) + \ell_{\rho_k}^k(z) + \gamma_k \langle x^{k+1} - \hat{x}^k, x - \hat{x}^k \rangle - \gamma_k \|x^{k+1} - \hat{x}^k\|^2 \\ &\quad + \beta_k \langle y^{k+1} - \hat{y}^k, y - \hat{y}^k \rangle - \frac{(2\beta_k - \rho_k L_B)}{2} \|y^{k+1} - \hat{y}^k\|^2, \end{aligned}$$

which is exactly (20).  $\square$

**Lemma B.2.** Let  $(z^k, \hat{\lambda}^k, z^{k+1}, \tilde{z}^{k+1})$  be generated by Algorithm [1](#). Then, for any  $\lambda \in \mathbb{R}^n$ , if  $0 \leq 2\eta_k \leq \rho_k \tau_k$ , then one has

$$\begin{aligned} \mathcal{L}_{\rho_k}(z^{k+1}, \lambda) &\leq (1 - \tau_k) \mathcal{L}_{\rho_{k-1}}(z^k, \lambda) + \tau_k F(z^*) + \frac{\gamma_k \tau_k^2}{2} [\|\tilde{x}^k - x^*\|^2 - \|\tilde{x}^{k+1} - x^*\|^2] \\ &\quad + \frac{\beta_k \tau_k^2}{2} [\|\tilde{y}^k - y^*\|^2 - \|\tilde{y}^{k+1} - y^*\|^2] + \frac{\tau_k}{2\eta_k} [\|\hat{\lambda}^k - \lambda\|^2 - \|\hat{\lambda}^{k+1} - \lambda\|^2] \\ &\quad - \frac{(\beta_k - 2\rho_k L_B)}{2} \|y^{k+1} - \hat{y}^k\|^2 - \frac{(1 - \tau_k)}{2} [\rho_{k-1} - \rho_k(1 - \tau_k)] \|s^k\|^2, \end{aligned} \quad (24)$$

where  $\tau_k \in [0, 1]$ , and  $\rho_k, \beta_k, \gamma_k$ , and  $\eta_k$  are positive parameters, and  $s^k := Ax^k + By^k - c$ .

*Proof.* Using [\(20\)](#) with  $z = z^k$  and  $z = z^*$ , respectively, and then using [\(15\)](#), we obtain

$$\begin{aligned} \mathcal{L}_{\rho_k}(z^{k+1}, \hat{\lambda}^k) &\stackrel{(15)}{\leq} \mathcal{L}_{\rho_k}(z^k, \hat{\lambda}^k) - \frac{\rho_k}{2} \|s^k - \hat{s}^{k+1}\|^2 + \gamma_k \langle x^{k+1} - \hat{x}^k, x^k - \hat{x}^k \rangle \\ &\quad - \gamma_k \|x^{k+1} - \hat{x}^k\|^2 + \beta_k \langle y^{k+1} - \hat{y}^k, y^k - \hat{y}^k \rangle - \frac{(2\beta_k - \rho_k L_B)}{2} \|y^{k+1} - \hat{y}^k\|^2, \\ \mathcal{L}_{\rho_k}(z^{k+1}, \hat{\lambda}^k) &\stackrel{(15)}{\leq} F(z^*) - \frac{\rho_k}{2} \|\hat{s}^{k+1}\|^2 + \gamma_k \langle x^{k+1} - \hat{x}^k, x^* - \hat{x}^k \rangle - \gamma_k \|x^{k+1} - \hat{x}^k\|^2 \\ &\quad + \beta_k \langle y^{k+1} - \hat{y}^k, y^* - \hat{y}^k \rangle - \frac{(2\beta_k - \rho_k L_B)}{2} \|y^{k+1} - \hat{y}^k\|^2. \end{aligned}$$

Here,  $s^k := Ax^k + By^k - c$  and  $\hat{s}^{k+1} := Ax^{k+1} + B\hat{y}^k - c$ . Multiplying the first inequality by  $(1 - \tau_k) \in [0, 1]$  and the second one by  $\tau_k \in [0, 1]$  and summing up the results, and then using the fact that  $\mathcal{L}_{\rho_k}(z^k, \hat{\lambda}^k) = \mathcal{L}_{\rho_{k-1}}(z^k, \hat{\lambda}^k) + \frac{(\rho_k - \rho_{k-1})}{2} \|s^k\|^2$ , we can estimate

$$\begin{aligned} \mathcal{L}_{\rho_k}(z^{k+1}, \hat{\lambda}^k) &\leq (1 - \tau_k) \mathcal{L}_{\rho_k}(z^k, \hat{\lambda}^k) + \tau_k F(z^*) - \frac{(1 - \tau_k) \rho_k}{2} \|s^k - \hat{s}^{k+1}\|^2 - \frac{\tau_k \rho_k}{2} \|\hat{s}^{k+1}\|^2 \\ &\quad + \gamma_k \tau_k \langle x^{k+1} - \hat{x}^k, x^* - \hat{x}^k \rangle - \gamma_k \|x^{k+1} - \hat{x}^k\|^2 + \beta_k \tau_k \langle y^{k+1} - \hat{y}^k, y^* - \hat{y}^k \rangle \\ &\quad - \frac{\beta_k}{2} \|y^{k+1} - \hat{y}^k\|^2 - \frac{(\beta_k - \rho_k L_B)}{2} \|y^{k+1} - \hat{y}^k\|^2 \\ &= (1 - \tau_k) \mathcal{L}_{\rho_{k-1}}(z^k, \hat{\lambda}^k) + \tau_k F(z^*) - \frac{\gamma_k}{2} \|x^{k+1} - \hat{x}^k\|^2 - \frac{(\beta_k - \rho_k L_B) \tau_k^2}{2} \|\tilde{y}^{k+1} - \hat{y}^k\|^2 \\ &\quad + \frac{\gamma_k \tau_k^2}{2} [\|\tilde{x}^k - x^*\|^2 - \|\tilde{x}^{k+1} - x^*\|^2] + \frac{\beta_k \tau_k^2}{2} [\|\tilde{y}^k - y^*\|^2 - \|\tilde{y}^{k+1} - y^*\|^2] \\ &\quad - \frac{(1 - \tau_k) \rho_k}{2} \|s^k - \hat{s}^{k+1}\|^2 - \frac{\tau_k \rho_k}{2} \|\hat{s}^{k+1}\|^2 + \frac{(1 - \tau_k)(\rho_k - \rho_{k-1})}{2} \|s^k\|^2. \end{aligned} \quad (25)$$

Here, we use  $\tau_k \tilde{x}^k = \hat{x}^k - (1 - \tau_k)x^k$ ,  $\tau_k \tilde{y}^k = \hat{y}^k - (1 - \tau_k)y^k$ ,  $\tau_k(\tilde{x}^{k+1} - \hat{x}^k) = x^{k+1} - \hat{x}^k$ ,  $\tau_k(\tilde{y}^{k+1} - \hat{y}^k) = y^{k+1} - \hat{y}^k$ , and an elementary expression  $2\langle a, b \rangle - \|a\|^2 = \|a - b\|^2 - \|b\|^2$ .

Now, let  $\tilde{s}^{k+1/2} := A\tilde{x}^{k+1} + B\tilde{y}^k - c$ . Then, it is trivial to estimate the quantity  $\mathcal{T}_k$  below

$$\begin{aligned} \mathcal{T}_k &:= \frac{(1 - \tau_k) \rho_k}{2} \|s^k - \hat{s}^{k+1}\|^2 + \frac{\tau_k \rho_k}{2} \|\hat{s}^{k+1}\|^2 - \frac{(1 - \tau_k)(\rho_k - \rho_{k-1})}{2} \|s^k\|^2 \\ &= \frac{\rho_k}{2} \|\hat{s}^{k+1}\|^2 - (1 - \tau_k) \|s^k\|^2 + \frac{(1 - \tau_k)}{2} [\rho_{k-1} - \rho_k(1 - \tau_k)] \|s^k\|^2 \\ &= \frac{\rho_k \tau_k^2}{2} \|\tilde{s}^{k+1/2}\|^2 + \frac{(1 - \tau_k)}{2} [\rho_{k-1} - \rho_k(1 - \tau_k)] \|s^k\|^2. \end{aligned} \quad (26)$$

Here, we use the fact that  $\hat{s}^{k+1} - (1 - \tau_k)s^k = Ax^{k+1} + B\hat{y}^k - c - (1 - \tau_k)(Ax^k + By^k - c) = \tau_k(A\tilde{x}^{k+1} + B\tilde{y}^k - c) = \tau_k \tilde{s}^{k+1/2}$ .

Using the relation  $\mathcal{L}_\rho(z, \lambda) = \mathcal{L}_\rho(z, \hat{\lambda}) + \langle \hat{\lambda} - \lambda, Ax + By - c \rangle$  from [\(5\)](#),  $z^{k+1} - (1 - \tau_k)z^k = \tau_k \tilde{z}^{k+1}$ , and [\(26\)](#), we can further derive from [\(25\)](#) for any  $\lambda \in \mathbb{R}^n$  that

$$\begin{aligned} \mathcal{L}_{\rho_k}(z^{k+1}, \lambda) &\leq (1 - \tau_k) \mathcal{L}_{\rho_{k-1}}(z^k, \lambda) + \tau_k F(z^*) - \frac{(1 - \tau_k)}{2} [\rho_{k-1} - \rho_k(1 - \tau_k)] \|s^k\|^2 \\ &\quad + \frac{\gamma_k \tau_k^2}{2} [\|\tilde{x}^k - x^*\|^2 - \|\tilde{x}^{k+1} - x^*\|^2] + \frac{\beta_k \tau_k^2}{2} [\|\tilde{y}^k - y^*\|^2 - \|\tilde{y}^{k+1} - y^*\|^2] \\ &\quad - \frac{\gamma_k}{2} \|x^{k+1} - \hat{x}^k\|^2 - \frac{(\beta_k - \rho_k L_B) \tau_k^2}{2} \|\tilde{y}^{k+1} - \hat{y}^k\|^2 \\ &\quad + \tau_k \langle \hat{\lambda}^k - \lambda, A\tilde{x}^{k+1} + B\tilde{y}^{k+1} - c \rangle - \frac{\rho_k \tau_k^2}{2} \|\tilde{s}^{k+1/2}\|^2. \end{aligned} \quad (27)$$

Let  $\tilde{s}^{k+1} := A\tilde{x}^{k+1} + B\tilde{y}^{k+1} - c$ . From the update rule  $\hat{\lambda}^{k+1} := \hat{\lambda}^k - \eta_k(A\tilde{x}^{k+1} + B\tilde{y}^{k+1} - c) = \hat{\lambda}^k - \eta_k \tilde{s}^{k+1}$ , if we define  $M_k := \tau_k \langle \hat{\lambda}^k - \lambda, A\tilde{x}^{k+1} + B\tilde{y}^{k+1} - c \rangle$ , then we can estimate  $M_k$  as

$$\begin{aligned} M_k &= \frac{\tau_k}{\eta_k} \langle \hat{\lambda}^k - \lambda, \hat{\lambda}^k - \hat{\lambda}^{k+1} \rangle = \frac{\tau_k}{2\eta_k} [\|\hat{\lambda}^k - \lambda\|^2 - \|\hat{\lambda}^{k+1} - \lambda\|^2] + \frac{\tau_k}{2\eta_k} \|\hat{\lambda}^k - \hat{\lambda}^{k+1}\|^2 \\ &= \frac{\tau_k}{2\eta_k} [\|\hat{\lambda}^k - \lambda\|^2 - \|\hat{\lambda}^{k+1} - \lambda\|^2] + \frac{\eta_k \tau_k}{2} \|\tilde{s}^{k+1}\|^2. \end{aligned} \quad (28)$$

Substituting (28) into (27) we obtain

$$\begin{aligned}\mathcal{L}_{\rho_k}(z^{k+1}, \lambda) &\leq (1 - \tau_k)\mathcal{L}_{\rho_{k-1}}(z^k, \lambda) + \tau_k F(z^*) + \frac{\gamma_k \tau_k^2}{2} [\|\tilde{x}^k - x^*\|^2 - \|\tilde{x}^{k+1} - x^*\|^2] \\ &\quad + \frac{\beta_k \tau_k^2}{2} [\|\tilde{y}^k - y^*\|^2 - \|\tilde{y}^{k+1} - y^*\|^2] + \frac{\tau_k}{2\eta_k} [\|\hat{\lambda}^k - \lambda\|^2 - \|\hat{\lambda}^{k+1} - \lambda\|^2] \\ &\quad + \frac{\eta_k \tau_k}{2} \|\tilde{s}^{k+1}\|^2 - \frac{\rho_k \tau_k^2}{2} \|\tilde{s}^{k+1/2}\|^2 - \frac{(\beta_k - \rho_k L_B) \tau_k^2}{2} \|\tilde{y}^{k+1} - \tilde{y}^k\|^2 \\ &\quad - \frac{(1 - \tau_k)}{2} [\rho_{k-1} - \rho_k(1 - \tau_k)] \|s^k\|^2.\end{aligned}\tag{29}$$

Finally, by using  $\|u\|^2 - 2\|v\|^2 \leq 2\|u - v\|^2$ , it is straightforward to show that if  $2\eta_k \leq \rho_k \tau_k$ , then

$$\frac{\eta_k \tau_k}{2} \|\tilde{s}^{k+1}\|^2 - \frac{\rho_k \tau_k^2}{2} \|\tilde{s}^{k+1/2}\|^2 \leq \frac{L_B \rho_k \tau_k}{2} \|\tilde{y}^{k+1} - \tilde{y}^k\|^2.$$

Therefore, substituting this estimate into (29), we obtain (24).  $\square$

From Lemma B.2 we need to derive rules for updating the parameters  $\tau_k$ ,  $\rho_k$ ,  $\gamma_k$ ,  $\beta_k$ , and  $\eta_k$ . These updates are guided by the following lemma, which is shown in Algorithm 1.

**Lemma B.3.** *If the parameters  $\tau_k$ ,  $\rho_k$ ,  $\gamma_k$ ,  $\beta_k$ , and  $\eta_k$  are updated as*

$$\begin{cases} \tau_k := \frac{1}{k+1}, & \rho_k := \rho_0(k+1), & \beta_k := 2L_B \rho_0(k+1), \\ \eta_k := \frac{\rho_0}{2}, & \text{and } 0 \leq \gamma_{k+1} \leq \left(\frac{k+2}{k+1}\right)\gamma_k, \end{cases}\tag{30}$$

then the sequence  $\{(z^k, \tilde{z}^k)\}$  satisfies

$$2kS_{\rho_{k-1}}(z^k, \hat{\lambda}^0) + \frac{\gamma_k}{k+1} \|\tilde{x}^k - x^*\|^2 + 2\rho_0 L_B \|\tilde{y}^k - y^*\|^2 \leq \gamma_0 \|x^0 - x^*\|^2 + 2\rho_0 L_B \|y^0 - y^*\|^2, \tag{31}$$

where  $S_{\rho_{k-1}}(z^k, \hat{\lambda}^0) := \mathcal{L}_{\rho_{k-1}}(z^k, \hat{\lambda}^0) - F^*$ , and  $\rho_0 > 0$  and  $\gamma_0 \geq 0$  are given.

*Proof.* First, we choose to update  $\tau_k$  as  $\tau_k = \frac{1}{k+1}$ . Then,  $\tau_0 = 1$ . From the last term of (24), we impose  $\rho_{k-1} - \rho_k(1 - \tau_k) = 0$ . This suggests us to update  $\rho_k$  as  $\rho_k = \rho_0(k+1)$ .

We also choose  $\beta_k := 2L_B \rho_k$  and  $\eta_k := \frac{\rho_k \tau_k}{2}$  to guarantee  $\beta_k - 2\rho_k L_B \geq 0$  and  $2\eta_k \leq \rho_k \tau_k$ , respectively. Using the update of  $\tau_k$  and  $\rho_k$ , we can easily show that  $\beta_k = 2L_B \rho_0(k+1)$  and  $\eta_k := \frac{\rho_0}{2}$  as shown in (30).

Using the update (30) and  $\lambda := \hat{\lambda}^0$  into (24) with  $S_k := \mathcal{L}_{\rho_{k-1}}(z^k, \hat{\lambda}^0) - F^*$ , we have

$$\begin{aligned}(k+1)S_{k+1} + \frac{1}{\rho_0} \|\hat{\lambda}^{k+1} - \hat{\lambda}^0\|^2 &+ \frac{\gamma_k}{2(k+1)} \|\tilde{x}^{k+1} - x^*\|^2 + \rho_0 L_B \|\tilde{y}^{k+1} - y^*\|^2 \leq kS_k \\ &+ \frac{1}{\rho_0} \|\hat{\lambda}^k - \hat{\lambda}^0\|^2 + \frac{\gamma_k}{2(k+1)} \|\tilde{x}^k - x^*\|^2 + \rho_0 L_B \|\tilde{y}^k - y^*\|^2.\end{aligned}$$

We also choose  $\frac{\gamma_{k+1}}{k+2} \leq \frac{\gamma_k}{k+1}$ . Hence, by induction, the last inequality leads to

$$kS_k + \frac{1}{\rho_0} \|\hat{\lambda}^k - \hat{\lambda}^0\|^2 + \frac{\gamma_k}{2(k+1)} \|\tilde{x}^k - x^*\|^2 + \rho_0 L_B \|\tilde{y}^k - y^*\|^2 \leq \frac{\gamma_0}{2} \|\tilde{x}^0 - x^*\|^2 + \rho_0 L_B \|\tilde{y}^0 - y^*\|^2.$$

Since  $\tilde{x}^0 = x^0$  and  $\tilde{y}^0 = y^0$ , by ignoring the term  $\frac{1}{\rho_0} \|\hat{\lambda}^k - \hat{\lambda}^0\|^2$ , the last inequality leads to (31).

Finally, the condition  $\frac{\gamma_{k+1}}{k+2} \leq \frac{\gamma_k}{k+1}$  holds if  $0 \leq \gamma_{k+1} \leq \left(\frac{k+2}{k+1}\right)\gamma_k$ .  $\square$

**The proof of Theorem 3.1** Let  $R_0^2 := \gamma_0 \|x^0 - x^*\|^2 + 2\rho_0 L_B \|y^0 - y^*\|^2$ . From (31), we have  $S_{\rho_{k-1}}(z^k, \hat{\lambda}^0) = \mathcal{L}_{\rho_k}(z^k, \hat{\lambda}^0) - F^* \leq \frac{R_0^2}{2k}$ . Moreover,  $\rho_{k-1} = \rho_0 k$ . Substituting these two expressions into (6), we obtain (8).  $\square$

## C Lower bound on convergence rates of Algorithm 1

In order to show that the convergence rate of Algorithm 1 is optimal, we consider the following example studied in [28]:

$$\min_{z:=[x,y]} \left\{ F(z) := f(x) + g(y) \mid x - y = 0 \right\}, \tag{32}$$

which is a split reformulation of an additive composite objective function  $F(x) = f(x) + g(x)$ . Algorithm 1 for solving (32) can be cast as a special case of the following generic scheme:

$$\begin{cases} (\hat{y}^k, \hat{\lambda}^k) & \text{are linear combinations of previous iterates} \\ x^{k+1} & := \text{prox}_{\gamma_k f}(\hat{x}^k - \gamma_k^{-1} \hat{\lambda}^k) \\ (\tilde{x}^{k+1}, \hat{\lambda}^{k+1}) & \text{are linear combinations of computed iterates} \\ y^{k+1} & := \text{prox}_{\beta_k g}(\tilde{x}^{k+1} - \beta_k^{-1} \hat{\lambda}^{k+1}). \end{cases} \quad (33)$$

Then, there exist  $f$  and  $g$  defined on  $\{x \in \mathbb{R}^{6k+5} \mid \|x\| \leq B\}$  which are convex and  $L_f$ -Lipschitz continuous such that the general primal-dual scheme (33) exhibits a lower bound:

$$F(\check{x}^k) \geq \frac{L_f B}{8(k+1)},$$

where  $\check{x}^k := \sum_{j=1}^k \alpha_j x^j + \sum_{l=1}^k \sigma_l y^l$  for any  $\alpha_j$  and  $\sigma_l$  with  $j, l = 1, \dots, k$ . This example can be found in [14 Proposition 5]. Consequently, Algorithm 1 has a lower bound convergence rate of  $\mathcal{O}(\frac{1}{k})$ . Hence, the  $\mathcal{O}(\frac{1}{k})$  convergence rate stated in Theorem 3.1 is optimal within a constant factor.

## D Convergence analysis of Algorithm 2

Lemmas D.1 and D.2 provide key estimates to prove the convergence of Algorithm 2

**Lemma D.1.** Assume that  $\mathcal{L}_\rho$  is defined by (5), and  $\ell_\rho^k$  is defined by (14). Let  $\mathcal{Q}_\rho^k$  be defined as

$$\mathcal{Q}_{\rho_k}^k(y) := \phi_{\rho_k}(\hat{z}^{k+1}, \hat{\lambda}^k) + \langle \nabla_y \phi_{\rho_k}(\hat{z}^{k+1}, \hat{\lambda}^k), y - \hat{y}^k \rangle + \frac{\rho_k L_B}{2} \|y - \hat{y}^k\|^2. \quad (34)$$

Then,  $\phi_{\rho_k}(x^{k+1}, y, \hat{\lambda}^k) \leq \mathcal{Q}_{\rho_k}^k(y)$  for any  $y \in \mathbb{R}^{\hat{p}}$ .

Let  $(x^{k+1}, \tilde{z}^{k+1}, \hat{z}^k, \hat{\lambda}^k)$  be computed by Algorithm 2 and  $\check{y}^{k+1} := (1 - \tau_k)y^k + \tau_k \tilde{y}^{k+1}$ . Then, for any  $z \in \text{dom}(F)$ , we have

$$\begin{aligned} \check{\mathcal{L}}_{\rho_k}^{k+1} &:= f(x^{k+1}) + g(\check{y}^{k+1}) + \mathcal{Q}_{\rho_k}^k(\check{y}^{k+1}) \leq (1 - \tau_k) [F(z^k) + \ell_{\rho_k}^k(z^k)] \\ &\quad + \tau_k [F(z) + \ell_{\rho_k}^k(z)] + \frac{\gamma_k \tau_k^2}{2} \|\tilde{x}^k - x\|^2 - \frac{\gamma_k \tau_k^2}{2} \|\tilde{x}^{k+1} - x\|^2 - \frac{\gamma_k}{2} \|x^{k+1} - \hat{x}^k\|^2 \\ &\quad + \frac{\beta_k \tau_k^2}{2} \|\tilde{y}^k - y\|^2 - \frac{\beta_k \tau_k^2 + \mu_g \tau_k}{2} \|\tilde{y}^{k+1} - y\|^2 - \frac{(\beta_k - \rho_k L_B) \tau_k^2}{2} \|\tilde{y}^{k+1} - \tilde{y}^k\|^2. \end{aligned} \quad (35)$$

*Proof.* Since  $\hat{z}^k = (1 - \tau_k)z^k + \tau_k \tilde{z}^k$ , we have  $(1 - \tau_k)x^k + \tau_k \tilde{x}^{k+1} - x^{k+1} = 0$  and  $\check{y}^{k+1} - \tilde{y}^k = \tau_k(\tilde{y}^{k+1} - \tilde{y}^k)$ . Using these expressions,  $\check{y}^{k+1}$ ,  $\ell_{\rho_k}^k$  in (14), and  $\mathcal{Q}_{\rho_k}^k$  in (34), we can derive

$$\begin{aligned} \mathcal{Q}_{\rho_k}^k(\check{y}^{k+1}) &= \phi_{\rho_k}(\hat{z}^{k+1}, \hat{\lambda}^k) + \langle \nabla_y \phi_{\rho_k}(\hat{z}^{k+1}, \hat{\lambda}^k), \check{y}^{k+1} - \hat{y}^k \rangle + \frac{\rho_k L_B}{2} \|\check{y}^{k+1} - \hat{y}^k\|^2 \\ &= (1 - \tau_k) \left[ \phi_{\rho_k}(\hat{z}^{k+1}, \hat{\lambda}^k) + \langle \nabla_x \phi_{\rho_k}(\hat{z}^{k+1}, \hat{\lambda}^k), x^k - x^{k+1} \rangle + \langle \nabla_y \phi_{\rho_k}(\hat{z}^{k+1}, \hat{\lambda}^k), y^k - \hat{y}^k \rangle \right] \\ &\quad + \tau_k \left[ \phi_{\rho_k}(\hat{z}^{k+1}, \hat{\lambda}^k) + \langle \nabla_x \phi_{\rho_k}(\hat{z}^{k+1}, \hat{\lambda}^k), \tilde{x}^{k+1} - x^{k+1} \rangle + \langle \nabla_y \phi_{\rho_k}(\hat{z}^{k+1}, \hat{\lambda}^k), \tilde{y}^{k+1} - \hat{y}^k \rangle \right] \\ &\quad + \langle \nabla_x \phi_{\rho_k}(\hat{z}^{k+1}, \hat{\lambda}^k), (1 - \tau_k)x^k + \tau_k \tilde{x}^{k+1} - x^{k+1} \rangle + \frac{\rho_k \tau_k^2 L_B}{2} \|\tilde{y}^{k+1} - \tilde{y}^k\|^2 \\ &\stackrel{(14)}{=} (1 - \tau_k) \ell_{\rho_k}^k(z^k) + \tau_k \ell_{\rho_k}^k(\tilde{z}^{k+1}) + \frac{\rho_k \tau_k^2 L_B}{2} \|\tilde{y}^{k+1} - \tilde{y}^k\|^2. \end{aligned} \quad (36)$$

By the convexity of  $f$  and  $x^{k+1} - (1 - \tau_k)x^k = \tau_k \tilde{x}^{k+1}$ , for any  $x \in \text{dom}(f)$  and  $\nabla f(x^{k+1}) \in \partial f(x^{k+1})$ , we can estimate that

$$\begin{aligned} f(x^{k+1}) &\leq f((1 - \tau_k)x^k + \tau_k \tilde{x}^{k+1}) + \langle \nabla f(x^{k+1}), x^{k+1} - (1 - \tau_k)x^k - \tau_k x \rangle \\ &\leq (1 - \tau_k)f(x^k) + \tau_k f(\tilde{x}^{k+1}) + \tau_k \langle \nabla f(x^{k+1}), \tilde{x}^{k+1} - x \rangle, \end{aligned} \quad (37)$$

Since  $\check{y}^{k+1} := (1 - \tau_k)y^k + \tau_k \tilde{y}^{k+1}$ , by  $\mu_g$ -convexity of  $g$ , for any  $y \in \text{dom}(g)$  and  $\nabla g(\check{y}^{k+1}) \in \partial g(\check{y}^{k+1})$ , we have

$$\begin{aligned} g(\check{y}^{k+1}) &\leq (1 - \tau_k)g(y^k) + \tau_k g(\tilde{y}^{k+1}) - \frac{\tau_k(1 - \tau_k)\mu_g}{2} \|\tilde{y}^{k+1} - y^k\|^2 \\ &\leq (1 - \tau_k)g(y^k) + \tau_k g(y) + \tau_k \langle \nabla g(\check{y}^{k+1}), \tilde{y}^{k+1} - y \rangle - \frac{\tau_k \mu_g}{2} \|\tilde{y}^{k+1} - y\|^2. \end{aligned} \quad (38)$$

Next, note that

$$\begin{aligned}
\ell_{\rho_k}^k(\hat{z}^{k+1}) &= \phi_{\rho_k}(\hat{z}^{k+1}, \hat{\lambda}^k) + \langle \nabla_x \phi_{\rho_k}(\hat{z}^{k+1}, \hat{\lambda}^k), \tilde{x}^{k+1} - x^{k+1} \rangle + \langle \nabla_y \phi_{\rho_k}(\hat{z}^{k+1}, \hat{\lambda}^k), \tilde{y}^{k+1} - \hat{y}^k \rangle \\
&= \phi_{\rho_k}(\hat{z}^{k+1}, \hat{\lambda}^k) + \langle \nabla_x \phi_{\rho_k}(\hat{z}^{k+1}, \hat{\lambda}^k), x - x^{k+1} \rangle + \langle \nabla_y \phi_{\rho_k}(\hat{z}^{k+1}, \hat{\lambda}^k), y - \hat{y}^k \rangle \\
&\quad + \langle \nabla_x \phi_{\rho_k}(\hat{z}^{k+1}, \hat{\lambda}^k), \tilde{x}^{k+1} - x \rangle + \langle \nabla_y \phi_{\rho_k}(\hat{z}^{k+1}, \hat{\lambda}^k), \tilde{y}^{k+1} - y \rangle \\
&= \ell_{\rho_k}^k(z) + \langle \nabla_x \phi_{\rho_k}(\hat{z}^{k+1}, \hat{\lambda}^k), \tilde{x}^{k+1} - x \rangle + \langle \nabla_y \phi_{\rho_k}(\hat{z}^{k+1}, \hat{\lambda}^k), \tilde{y}^{k+1} - y \rangle.
\end{aligned} \tag{39}$$

Combining (36), (37), (38), and (39), for any  $z := (x, y) \in \text{dom}(F)$ , we can derive

$$\begin{aligned}
\check{\mathcal{L}}_{\rho_k}^{k+1} &\stackrel{(34)}{=} f(x^{k+1}) + g(\tilde{y}^{k+1}) + \mathcal{Q}_{\rho_k}^k(\tilde{y}^{k+1}) \\
&\stackrel{(37), (38), (39)}{\leq} (1 - \tau_k) [F(z^k) + \ell_{\rho_k}^k(z^k)] + \tau_k [F(z) + \ell_{\rho_k}^k(z)] \\
&\quad + \tau_k \langle \nabla f(x^{k+1}) + \nabla_x \phi_{\rho_k}(\hat{z}^{k+1}, \hat{\lambda}^k), \tilde{x}^{k+1} - x \rangle + \tau_k \langle \nabla g(\tilde{y}^{k+1}) + \nabla_y \phi_{\rho_k}(\hat{z}^{k+1}, \hat{\lambda}^k), \tilde{y}^{k+1} - y \rangle \\
&\quad - \frac{\tau_k \mu_g}{2} \|\tilde{y}^{k+1} - y\|^2 + \frac{\rho_k \tau_k^2 L_B}{2} \|\tilde{y}^{k+1} - \tilde{y}^k\|^2.
\end{aligned} \tag{40}$$

Next, from the optimality condition of the  $x$ - and  $y_i$ -subproblems in Algorithm 2 we can show that

$$\begin{cases} \nabla f(x^{k+1}) + \nabla_x \phi_{\rho_k}(\hat{z}^{k+1}, \hat{\lambda}^k) &= \gamma_k(\hat{x}^k - x^{k+1}), & \nabla f(x^{k+1}) \in \partial f(x^{k+1}), \\ \nabla g(\tilde{y}^{k+1}) + \nabla_y \phi_{\rho_k}(\hat{z}^{k+1}, \hat{\lambda}^k) &= \tau_k \beta_k(\tilde{y}^k - \tilde{y}^{k+1}), & \nabla g(\tilde{y}^{k+1}) \in \partial g(\tilde{y}^{k+1}). \end{cases} \tag{41}$$

Moreover, we also have

$$\begin{aligned}
2\tau_k \langle \hat{x}^k - x^{k+1}, \tilde{x}^{k+1} - x \rangle &= \tau_k^2 \|\hat{x}^k - x\|^2 - \tau_k^2 \|\tilde{x}^{k+1} - x\|^2 - \|x^{k+1} - \hat{x}^k\|^2 \\
2\langle \tilde{y}^k - \tilde{y}^{k+1}, \tilde{y}^{k+1} - y \rangle &= \|\tilde{y}^k - y\|^2 - \|\tilde{y}^{k+1} - y\|^2 - \|\tilde{y}^{k+1} - \tilde{y}^k\|^2.
\end{aligned} \tag{42}$$

Using (41) and (42) into (40), we can further derive

$$\begin{aligned}
\check{\mathcal{L}}_{\rho_k}^{k+1} &\stackrel{(35)}{\leq} (1 - \tau_k) [F(z^k) + \ell_{\rho_k}^k(z^k)] + \tau_k [F(z) + \ell_{\rho_k}^k(z)] - \frac{\tau_k \mu_g}{2} \|\tilde{y}^{k+1} - y\|^2 \\
&\quad + \tau_k \gamma_k \langle \hat{x}^k - x^{k+1}, \tilde{x}^{k+1} - x \rangle + \tau_k^2 \beta_k \langle \tilde{y}^k - \tilde{y}^{k+1}, \tilde{y}^{k+1} - y \rangle + \frac{\rho_k \tau_k^2 L_B}{2} \|\tilde{y}^{k+1} - \tilde{y}^k\|^2 \\
&\stackrel{(42)}{\leq} (1 - \tau_k) [F(z^k) + \ell_{\rho_k}^k(z^k)] + \tau_k [F(z) + \ell_{\rho_k}^k(z)] \\
&\quad + \frac{\gamma_k \tau_k^2}{2} \|\hat{x}^k - x\|^2 - \frac{\gamma_k \tau_k^2}{2} \|\tilde{x}^{k+1} - x\|^2 - \frac{\gamma_k}{2} \|x^{k+1} - \hat{x}^k\|^2 \\
&\quad + \frac{\beta_k \tau_k^2}{2} \|\tilde{y}^k - y\|^2 - \frac{(\beta_k \tau_k^2 + \mu_g \tau_k)}{2} \|\tilde{y}^{k+1} - y\|^2 - \frac{(\beta_k - \rho_k L_B) \tau_k^2}{2} \|\tilde{y}^{k+1} - \tilde{y}^k\|^2,
\end{aligned}$$

which is exactly (35).  $\square$

**Lemma D.2.** Let  $\{(z^k, \hat{z}^k, \tilde{z}^k, \hat{\lambda}^k)\}$  be the sequence generated by Algorithm 2. Then

$$\begin{aligned}
\mathcal{L}_{\rho_k}(z^{k+1}, \hat{\lambda}^k) &\leq (1 - \tau_k) \mathcal{L}_{\rho_{k-1}}(z^k, \hat{\lambda}^k) + \tau_k F(z^*) - \frac{(1 - \tau_k)}{2} (\rho_{k-1} - \rho_k (1 - \tau_k)) \|s^k\|^2 \\
&\quad + \frac{\gamma_k \tau_k^2}{2} \|\tilde{x}^k - x^*\|^2 - \frac{\gamma_k \tau_k^2}{2} \|\tilde{x}^{k+1} - x^*\|^2 - \frac{\gamma_k}{2} \|x^{k+1} - \hat{x}^k\|^2 \\
&\quad + \frac{\beta_k \tau_k^2}{2} \|\tilde{y}^k - y^*\|^2 - \frac{(\beta_k \tau_k^2 + \mu_g \tau_k)}{2} \|\tilde{y}^{k+1} - y^*\|^2 - \frac{(\beta_k - \rho_k L_B) \tau_k^2}{2} \|\tilde{y}^{k+1} - \tilde{y}^k\|^2 \\
&\quad - \langle \hat{\lambda}^k - \hat{\lambda}^0, B(y^{k+1} - \tilde{y}^{k+1}) \rangle - \frac{\rho_k L_B}{2} \|y^{k+1} - \tilde{y}^{k+1}\|^2 - \frac{\rho_k \tau_k^2}{2} \|\tilde{s}^{k+1/2}\|^2,
\end{aligned} \tag{43}$$

where  $\gamma_k$ ,  $\beta_k$ , and  $\rho_k$  are positive parameters,  $\tau_k \in [0, 1]$ ,  $s^k := Ax^k + By^k - c$ ,  $\tilde{s}^{k+1/2} := A\tilde{x}^{k+1} + B\tilde{y}^k - c$ , and  $\tilde{y}^{k+1} := (1 - \tau_k)y^k + \tau_k \tilde{y}^{k+1}$ .

*Proof.* Using (35) with  $z = z^*$ , and then combining the result with (15), we obtain

$$\begin{aligned}
\check{\mathcal{L}}_{\rho_k}^{k+1} &\leq (1 - \tau_k) \mathcal{L}_{\rho_k}(z^k, \hat{\lambda}^k) + \tau_k F(z^*) - \frac{(1 - \tau_k) \rho_k}{2} \|\hat{s}^{k+1} - s^k\|^2 - \frac{\rho_k \tau_k}{2} \|\hat{s}^{k+1}\|^2 \\
&\quad + \frac{\gamma_k \tau_k^2}{2} \|\tilde{x}^k - x^*\|^2 - \frac{\gamma_k \tau_k^2}{2} \|\tilde{x}^{k+1} - x^*\|^2 - \frac{\gamma_k}{2} \|x^{k+1} - \hat{x}^k\|^2 \\
&\quad + \frac{\beta_k \tau_k^2}{2} \|\tilde{y}^k - y\|^2 - \frac{(\beta_k \tau_k^2 + \mu_g \tau_k)}{2} \|\tilde{y}^{k+1} - y\|^2 - \frac{(\beta_k - \rho_k L_B) \tau_k^2}{2} \|\tilde{y}^{k+1} - \tilde{y}^k\|^2.
\end{aligned}$$

Next, using  $\mathcal{L}_{\rho_k}(z^k, \hat{\lambda}^k) = \mathcal{L}_{\rho_{k-1}}(z^k, \hat{\lambda}^k) + \frac{(\rho_k - \rho_{k-1})}{2} \|s^k\|^2$  in the last inequality, and then combining the result with (26), we obtain

$$\begin{aligned} \check{\mathcal{L}}_{\rho_k}^{k+1} &\leq (1 - \tau_k) \mathcal{L}_{\rho_{k-1}}(z^k, \hat{\lambda}^k) + \tau_k F(z^*) - \frac{(1 - \tau_k)(\rho_{k-1} - \rho_k(1 - \tau_k))}{2} \|s^k\|^2 - \frac{\rho_k \tau_k^2}{2} \|\tilde{s}^{k+1/2}\|^2 \\ &\quad + \frac{\gamma_k \tau_k^2}{2} \|\tilde{x}^k - x^*\|^2 - \frac{\gamma_k \tau_k^2}{2} \|\tilde{x}^{k+1} - x^*\|^2 - \frac{\gamma_k}{2} \|x^{k+1} - \hat{x}^k\|^2 \\ &\quad + \frac{\beta_k \tau_k^2}{2} \|\tilde{y}^k - y^*\|^2 - \frac{(\beta_k \tau_k^2 + \mu_g \tau_k)}{2} \|\tilde{y}^{k+1} - y^*\|^2 - \frac{(\beta_k - \rho_k L_B) \tau_k^2}{2} \|\tilde{y}^{k+1} - \tilde{y}^k\|^2. \end{aligned} \quad (44)$$

Now, we consider two cases corresponding to the two options at Step 11 of Algorithm 2

**Option 1:** If  $y^{k+1} = \check{y}^{k+1}$ , then we have

$$\begin{aligned} \mathcal{L}_{\rho_k}(z^{k+1}, \hat{\lambda}^k) &= f(x^{k+1}) + g(y^{k+1}) + \phi_{\rho_k}(z^{k+1}, \hat{\lambda}^k) \\ &\stackrel{(17)}{\leq} f(x^{k+1}) + g(\check{y}^{k+1}) + \phi_{\rho_k}(\hat{z}^{k+1}, \hat{\lambda}^k) + \langle \nabla_y \phi_{\rho_k}(\hat{z}^{k+1}, \hat{\lambda}^k), \check{y}^{k+1} - \hat{y}^k \rangle \\ &\quad + \frac{\rho_k L_B}{2} \|\check{y}^{k+1} - \hat{y}^k\|^2 \\ &= f(x^{k+1}) + g(\check{y}^{k+1}) + \mathcal{Q}_{\rho_k}^k(\check{y}^{k+1}) \\ &= \check{\mathcal{L}}_{\rho_k}^{k+1} \\ &= \check{\mathcal{L}}_{\rho_k}^{k+1} - \langle \hat{\lambda}^k - \hat{\lambda}^0, B(y^{k+1} - \check{y}^{k+1}) \rangle - \frac{\rho_k L_B}{2} \|y^{k+1} - \check{y}^{k+1}\|^2. \end{aligned}$$

Here, the last relation follows from the fact that  $\langle \hat{\lambda}^k - \hat{\lambda}^0, B(y^{k+1} - \check{y}^{k+1}) \rangle + \frac{\rho_k L_B}{2} \|y^{k+1} - \check{y}^{k+1}\|^2 = 0$  since  $y^{k+1} = \check{y}^{k+1}$ . Combining the last estimate and (44), we obtain the key estimate (43).

**Option 2:** If we choose  $y_i^{k+1} := \text{prox}_{g_i/(\rho_k L_B)}(\hat{y}_i^k - \frac{1}{\rho_k L_B} B_i^\top(\rho_k r^k - \hat{\lambda}^0))$ , then we write it as

$$y_i^{k+1} = \underset{y_i}{\text{argmin}} \left\{ g_i(y_i) + \langle \nabla_{y_i} \phi_{\rho_k}(\hat{z}^{k+1}, \hat{\lambda}^0), y_i - \hat{y}_i^k \rangle + \frac{\rho_k L_B}{2} \|y_i - \hat{y}_i^k\|^2 \right\} \text{ for all } i = 1, \dots, m.$$

From the optimality condition of these  $y_i$ -subproblems, one can easily show that

$$\begin{aligned} &g(y^{k+1}) + \langle \nabla_y \phi_{\rho_k}(\hat{z}^{k+1}, \hat{\lambda}^0), y^{k+1} - \hat{y}^k \rangle + \frac{\rho_k L_B}{2} \|y^{k+1} - \hat{y}^k\|^2 \\ &\leq g(\check{y}^{k+1}) + \langle \nabla_y \phi_{\rho_k}(\hat{z}^{k+1}, \hat{\lambda}^0), \check{y}^{k+1} - \hat{y}^k \rangle + \frac{\rho_k L_B}{2} \|\check{y}^{k+1} - \hat{y}^k\|^2 - \frac{\rho_k L_B}{2} \|y^{k+1} - \check{y}^{k+1}\|^2. \end{aligned}$$

Using  $\phi_{\rho_k}(x^{k+1}, \check{y}^{k+1}, \hat{\lambda}^k) \leq \mathcal{Q}_{\rho_k}^k(\check{y}^{k+1})$  from Lemma D.1 and the last inequality, we can derive

$$\begin{aligned} \mathcal{L}_{\rho_k}(z^{k+1}, \hat{\lambda}^k) &= f(x^{k+1}) + g(y^{k+1}) + \phi_{\rho_k}(z^{k+1}, \hat{\lambda}^k) \\ &\stackrel{(17)}{\leq} f(x^{k+1}) + g(y^{k+1}) + \phi_{\rho_k}(\hat{z}^{k+1}, \hat{\lambda}^k) + \langle \nabla_y \phi_{\rho_k}(\hat{z}^{k+1}, \hat{\lambda}^k), y^{k+1} - \hat{y}^k \rangle \\ &\quad + \frac{\rho_k L_B}{2} \|y^{k+1} - \hat{y}^k\|^2 \\ &= f(x^{k+1}) + \phi_{\rho_k}(\hat{z}^{k+1}, \hat{\lambda}^k) - \langle B^\top(\hat{\lambda}^k - \hat{\lambda}^0), y^{k+1} - \hat{y}^k \rangle \\ &\quad + g(y^{k+1}) + \langle \nabla_y \phi_{\rho_k}(\hat{z}^{k+1}, \hat{\lambda}^0), y^{k+1} - \hat{y}^k \rangle + \frac{\rho_k L_B}{2} \|y^{k+1} - \hat{y}^k\|^2 \\ &\leq f(x^{k+1}) + \phi_{\rho_k}(\hat{z}^{k+1}, \hat{\lambda}^k) - \langle B^\top(\hat{\lambda}^k - \hat{\lambda}^0), y^{k+1} - \hat{y}^k \rangle - \frac{\rho_k L_B}{2} \|y^{k+1} - \check{y}^{k+1}\|^2 \\ &\quad + g(\check{y}^{k+1}) + \langle \nabla_y \phi_{\rho_k}(\hat{z}^{k+1}, \hat{\lambda}^0), \check{y}^{k+1} - \hat{y}^k \rangle + \frac{\rho_k L_B}{2} \|\check{y}^{k+1} - \hat{y}^k\|^2 \\ &\leq \check{\mathcal{L}}_{\rho_k}^{k+1} - \frac{\rho_k L_B}{2} \|y^{k+1} - \check{y}^{k+1}\|^2 - \langle \hat{\lambda}^k - \hat{\lambda}^0, B(y^{k+1} - \check{y}^{k+1}) \rangle. \end{aligned}$$

Combining this estimate and (44), we obtain the key estimate (43).  $\square$

Our next step is to show how to choose the parameters  $\gamma_k, \beta_k, \rho_k$ , and  $\tau_k \in [0, 1]$  such that we can obtain a convergence property of  $\mathcal{L}_{\rho_k}(\cdot)$ .

**Lemma D.3.** *If the parameters  $\tau_k, \rho_k, \gamma_k, \beta_k$ , and  $\eta_k$  are updated as*

$$\begin{cases} \tau_k := \frac{1}{2} \tau_{k-1} ((\tau_{k-1}^2 + 4)^{1/2} - \tau_{k-1}), & \rho_k := \frac{\rho_0}{\tau_k^2}, \\ \gamma_k := \gamma_0 \geq 0, & \beta_k := 2L_B \rho_k, \text{ and } \eta_k := \frac{\rho_k \tau_k}{2}, \end{cases} \quad (45)$$

with  $\tau_0 := 1$  and  $\rho_0 \in (0, \frac{\mu_g}{4L_B}]$ , then

$$\mathcal{L}_{\rho_{k-1}}(z^k, \hat{\lambda}^0) - F(z^*) \leq \frac{\tau_{k-1}^2}{2} [\gamma_0 \|\tilde{x}^0 - x^*\|^2 + 2\rho_0 L_B \|\tilde{y}^0 - y^*\|^2]. \quad (46)$$

*Proof.* Since  $\mathcal{L}_\rho(z, \hat{\lambda}^0) = \mathcal{L}_\rho(z, \hat{\lambda}^k) + \langle \hat{\lambda}^k - \hat{\lambda}^0, Ax + By - c \rangle$ , from (43), we have

$$\begin{aligned} \mathcal{L}_{\rho_k}(z^{k+1}, \hat{\lambda}^0) &\leq (1 - \tau_k) \mathcal{L}_{\rho_{k-1}}(z^k, \hat{\lambda}^0) + \tau_k F(z^*) - \frac{(1 - \tau_k)}{2} (\rho_{k-1} - \rho_k (1 - \tau_k)) \|s^k\|^2 \\ &\quad + \frac{\gamma_k \tau_k^2}{2} \|\tilde{x}^k - x^*\|^2 - \frac{\gamma_k \tau_k^2}{2} \|\tilde{x}^{k+1} - x^*\|^2 - \frac{\gamma_k}{2} \|x^{k+1} - \hat{x}^k\|^2 \\ &\quad + \frac{\beta_k \tau_k^2}{2} \|\tilde{y}^k - y^*\|^2 - \frac{(\beta_k \tau_k^2 + \mu_g \tau_k)}{2} \|\tilde{y}^{k+1} - y^*\|^2 - \frac{(\beta_k - \rho_k L_B) \tau_k^2}{2} \|\tilde{y}^{k+1} - \tilde{y}^k\|^2 \\ &\quad + \langle \hat{\lambda}^k - \hat{\lambda}^0, Ax^{k+1} + By^{k+1} - c - (1 - \tau_k)(Ax^k + By^k - c) \rangle \\ &\quad - \langle \hat{\lambda}^k - \hat{\lambda}^0, B(y^{k+1} - \tilde{y}^{k+1}) \rangle - \frac{\rho_k L_B}{2} \|y^{k+1} - \tilde{y}^{k+1}\|^2 - \frac{\rho_k \tau_k^2}{2} \|\tilde{s}^{k+1/2}\|^2. \end{aligned} \quad (47)$$

Now, using  $\tilde{y}^{k+1} - (1 - \tau_k)y^k = \tau_k \tilde{y}^{k+1}$ ,  $x^{k+1} - (1 - \tau_k)x^k = \tau_k \tilde{x}^{k+1}$ , and the dual update  $\hat{\lambda}^{k+1} := \hat{\lambda}^k - \eta_k(A\tilde{x}^{k+1} + B\tilde{y}^{k+1} - c) = \hat{\lambda}^k - \eta_k \tilde{s}^{k+1}$ , we can show that

$$\begin{aligned} M_k &:= \langle \hat{\lambda}^k - \hat{\lambda}^0, Ax^{k+1} + By^{k+1} - c - (1 - \tau_k)(Ax^k + By^k - c) - B(y^{k+1} - \tilde{y}^{k+1}) \rangle \\ &= \langle \hat{\lambda}^k - \hat{\lambda}^0, Ax^{k+1} + B\tilde{y}^{k+1} - c - (1 - \tau_k)(Ax^k + By^k - c) \rangle \\ &= \tau_k \langle \hat{\lambda}^k - \hat{\lambda}^0, A\tilde{x}^{k+1} + B\tilde{y}^{k+1} - c \rangle \\ &= \frac{\tau_k}{\eta_k} \langle \hat{\lambda}^k - \hat{\lambda}^0, \hat{\lambda}^k - \hat{\lambda}^{k+1} \rangle = \frac{\tau_k}{2\eta_k} [\|\hat{\lambda}^k - \hat{\lambda}^0\|^2 - \|\hat{\lambda}^{k+1} - \hat{\lambda}^0\|^2] + \frac{\eta_k \tau_k}{2} \|\tilde{s}^{k+1}\|^2. \end{aligned}$$

Using this estimate of  $M_k$  into (47), similar to (29), if  $2\eta_k \leq \rho_k \tau_k$ , then we can show that

$$\begin{aligned} \mathcal{L}_{\rho_k}(z^{k+1}, \hat{\lambda}^0) &\leq (1 - \tau_k) \mathcal{L}_{\rho_{k-1}}(z^k, \hat{\lambda}^0) + \tau_k F(z^*) - \frac{(1 - \tau_k)}{2} (\rho_{k-1} - \rho_k (1 - \tau_k)) \|s^k\|^2 \\ &\quad + \frac{\gamma_k \tau_k^2}{2} \|\tilde{x}^k - x^*\|^2 - \frac{\gamma_k \tau_k^2}{2} \|\tilde{x}^{k+1} - x^*\|^2 + \frac{\beta_k \tau_k^2}{2} \|\tilde{y}^k - y^*\|^2 \\ &\quad - \frac{(\beta_k \tau_k^2 + \mu_g \tau_k)}{2} \|\tilde{y}^{k+1} - y^*\|^2 - \frac{(\beta_k - 2\rho_k L_B) \tau_k^2}{2} \|\tilde{y}^{k+1} - \tilde{y}^k\|^2 \\ &\quad - \frac{\rho_k L_B}{2} \|y^{k+1} - \tilde{y}^{k+1}\|^2 + \frac{\tau_k}{2\eta_k} [\|\hat{\lambda}^k - \hat{\lambda}^0\|^2 - \|\hat{\lambda}^{k+1} - \hat{\lambda}^0\|^2]. \end{aligned} \quad (48)$$

Let us first update  $\tau_k$  as  $\tau_k = \frac{1}{2} \tau_{k-1} ((\tau_{k-1}^2 + 4)^{1/2} - \tau_{k-1})$  with  $\tau_0 = 1$ , and  $\rho_k = \frac{\rho_{k-1}}{1 - \tau_k}$  as in (45). It is not hard to show that  $\frac{1}{k+1} \leq \tau_k \leq \frac{2}{k+2}$  and  $\rho_k = \frac{\rho_0}{\tau_k^2}$ . Moreover,  $\prod_{i=1}^{k-1} (1 - \tau_i) = \frac{1}{\tau_{k-1}^2} \leq \frac{4}{(k+1)^2}$ . To guarantee  $\beta_k \geq 2L_B \rho_k$  and  $2\eta_k \leq \rho_k \tau_k$ , we can update  $\beta_k := 2L_B \rho_k$  and  $\eta_k := \frac{\rho_k \tau_k}{2}$ . Therefore, (48) can be simplified as

$$\begin{aligned} \mathcal{L}_{\rho_k}(z^{k+1}, \hat{\lambda}^0) &\leq (1 - \tau_k) \mathcal{L}_{\rho_{k-1}}(z^k, \hat{\lambda}^0) + \tau_k F(z^*) + \frac{\gamma_k \tau_k^2}{2} \|\tilde{x}^k - x^*\|^2 \\ &\quad - \frac{\gamma_k \tau_k^2}{2} \|\tilde{x}^{k+1} - x^*\|^2 + \frac{\beta_k \tau_k^2}{2} \|\tilde{y}^k - y^*\|^2 - \frac{(\beta_k \tau_k^2 + \mu_g \tau_k)}{2} \|\tilde{y}^{k+1} - y^*\|^2 \\ &\quad + \frac{1}{\rho_k} [\|\hat{\lambda}^k - \hat{\lambda}^0\|^2 - \|\hat{\lambda}^{k+1} - \hat{\lambda}^0\|^2]. \end{aligned} \quad (49)$$

Now, let us define

$$A_k := \mathcal{L}_{\rho_{k-1}}(z^k, \hat{\lambda}^0) - F^* + \frac{1}{\rho_k} \|\hat{\lambda}^k - \hat{\lambda}^0\|^2 + \frac{\gamma_{k-1} \tau_{k-1}^2}{2} \|\tilde{x}^k - x^*\|^2 + \frac{(\beta_{k-1} \tau_{k-1}^2 + \mu_g \tau_{k-1})}{2} \|\tilde{y}^k - y^*\|^2.$$

Assume that

$$\frac{1}{\rho_k} \leq \frac{1}{\rho_{k-1}}, \quad \frac{\beta_k \tau_k^2}{1 - \tau_k} \leq \beta_{k-1} \tau_{k-1}^2 + \mu_g \tau_{k-1} \quad \text{and} \quad \frac{\gamma_k \tau_k^2}{1 - \tau_k} \leq \gamma_{k-1} \tau_{k-1}^2. \quad (50)$$

Then, (49) implies  $A_{k+1} \leq (1 - \tau_k) A_k$ . By induction, and  $\tau_0 = 1$ , we can show that

$$A_k \leq \frac{1}{2} \left( \prod_{i=1}^{k-1} (1 - \tau_i) \right) [\gamma_0 \|\tilde{x}^0 - x^*\|^2 + \beta_0 \|\tilde{y}^0 - y^*\|^2],$$

Since  $\prod_{i=1}^{k-1} (1 - \tau_i) = \tau_{k-1}^2$  and  $\beta_0 = 2L_B \rho_0$ , the last inequality implies  $S_{\rho_{k-1}}(z^k, \hat{\lambda}^0) := \mathcal{L}_{\rho_{k-1}}(z^k, \hat{\lambda}^0) - F(z^*) \leq \frac{\tau_{k-1}^2}{2} [\gamma_0 \|\tilde{x}^0 - x^*\|^2 + 2\rho_0 L_B \|\tilde{y}^0 - y^*\|^2]$ , which proves (46).

Since  $\beta_k := 2L_B \rho_k$ , the condition  $\frac{\beta_k \tau_k^2}{1 - \tau_k} \leq \beta_{k-1} \tau_{k-1}^2 + \mu_g \tau_{k-1}$  becomes  $L_B \rho_k \frac{\tau_k^2}{1 - \tau_k} \leq L_B \rho_{k-1} \tau_{k-1}^2 + \frac{\mu_g}{2} \tau_{k-1}$ . Using  $\rho_k = \frac{\rho_0}{\tau_k^2}$  and  $\frac{\tau_k}{1 - \tau_k} = \tau_{k-1}^2$ , the last condition holds if  $L_B \rho_0 \frac{\tau_{k-1}}{\tau_k} \leq \frac{\mu_g}{2}$ . Since  $1 \leq \frac{\tau_{k-1}}{\tau_k} \leq 2$ ,  $L_B \rho_0 \frac{\tau_{k-1}}{\tau_k} \leq \frac{\mu_g}{2}$  holds if  $4L_B \rho_0 \leq \mu_g$ . This condition leads to  $\rho_0 \leq \frac{\mu_g}{4L_B}$ .



Next, the condition  $\frac{\gamma_k \tau_k^2}{1 - \tau_k} \leq \gamma_{k-1} \tau_{k-1}^2$  shows that we can choose  $\gamma_k$  as  $\gamma_k \leq \gamma_{k-1}$ . This condition holds if we fix  $\gamma_k := \gamma_0 \geq 0$ . Now, we find the condition for  $\eta_k$  in (45). Since  $\rho_k = \frac{\rho_0}{\tau_k}$ , the condition  $\frac{1}{\rho_k} \leq \frac{1}{\rho_{k-1}}$  in (50) is automatically satisfied.  $\square$

**The proof of Theorem 3.2** Let  $R_0^2 := \gamma_0 \|x^0 - x^*\|^2 + 2\rho_0 L_B \|y^0 - y^*\|^2$ . Since  $\tilde{x}^0 = x^0$  and  $\tilde{y}^0 = y^0$ , from (46), we have  $S_{\rho_{k-1}}(z^k, \hat{\lambda}^0) = \mathcal{L}_{\rho_{k-1}}(z^k, \hat{\lambda}^0) - F^* \leq \tau_{k-1}^2 R_0^2 \leq \frac{2R_0^2}{(k+1)^2}$ . Moreover,  $\rho_{k-1} = \frac{\rho_0}{\tau_{k-1}^2} \geq \frac{\rho_0(k+1)^2}{4}$  and  $\rho_{k-1} S_{\rho_{k-1}}(z^k, \hat{\lambda}^0) \leq \rho_0 R_0^2$ . Substituting these estimates into (6), we obtain (9).  $\square$

#### 4.1 Lower bound of convergence rate for the semi-strongly convex case

We consider again example (32), where we assume that  $g$  is  $\mu_g$ -strongly convex. Algorithm 2 for solving (32) are special cases of (33) if  $g$  is strongly convex. Then, by [28, Theorem 2], the lower bound complexity of (33) to achieve  $\hat{x}$  such that  $F(\hat{x}) - F^* \leq \varepsilon$  is  $\Omega\left(\frac{1}{\sqrt{\varepsilon}}\right)$ . Consequently, the rate of Algorithm 2 stated in Theorem 3.2 is optimal.

## E Additional numerical experiments

We provide more numerical examples to support our theory presented in the main text.

### 5.1 The $\ell_1$ -Regularized Least Absolute Derivation (LAD)

We consider the following  $\ell_1$ -regularized least absolute derivation (LAD) problem widely studied in the literature:

$$F^* := \min_{y \in \mathbb{R}^{p_2}} \left\{ F(y) := \|By - c\|_1 + \kappa \|y\|_1 \right\}, \quad (51)$$

where  $B \in \mathbb{R}^{n \times \hat{p}}$  and  $c \in \mathbb{R}^n$  are given, and  $\kappa > 0$  is a regularization parameter. This problem is completely nonsmooth. If we introduce  $x := By - c$ , then we can reformulate (51) into (1) with two objective functions  $f(x) := \|x\|_1$  and  $g(y) := \kappa \|y\|_1$  and a linear constraint  $-x + By = c$ .

We use problem (51) to verify our theoretical results presented in Theorem 3.1 and Theorem 3.2. We implement Algorithm 1 (NEAPAL), its parallel scheme (NEAPAL-par), and Algorithm 2 (scvx-NEAPAL). We compare these algorithms with ASGARD [23] and its restarting variant, Chambolle-Pock's method [3], and standard ADMM [2]. For ADMM, we reformulate (51) into the following constrained setting:

$$\min_{x, y, z} \left\{ \|x\|_1 + \kappa \|z\|_1 \mid -x + By = c, y - z = 0 \right\}$$

to avoid expensive subproblems. We solve the subproblem in  $x$  using a preconditioned conjugate gradient method (PCG) with at most 20 iterations or up to  $10^{-5}$  accuracy.

We generate a matrix  $B$  using standard Gaussian distribution  $\mathcal{N}(0, 1)$  without and with correlated columns, and normalize it to get unit column norms. The observed vector  $c$  is generated as  $c := Bx^\dagger + \hat{\sigma}\mathcal{L}(0, 1)$ , where  $x^\dagger$  is a given  $s$ -sparse vector drawn from  $\mathcal{N}(0, 1)$ , and  $\hat{\sigma} = 0.01$  is the variance of noise generated from a Laplace distribution  $\mathcal{L}(0, 1)$ . For problems of the size  $(m, n, s) = (2000, 700, 100)$ , we tune to get a regularization parameter  $\kappa = 0.5$ .

We test these algorithms on two problem instances. The configuration is as follows:

- For NEAPAL and NEAPAL-par, we set  $\rho_0 := 5$ , which is obtained by upper bounding  $\frac{2\|\lambda^*\|}{\|B\| \|y^0 - y^*\|}$  as suggested by the theory. Here,  $y^*$  and  $\lambda^*$  are computed with the best accuracy using an interior-point algorithm in MOSEK.
- For scvx-NEAPAL we set  $\rho_0 = \frac{1}{4\|B\|^2}$  by choosing  $\mu_g = 0.5$ .
- For Chambolle-Pock's method, we run two variants. In the first variant, we set step-sizes  $\tau = \sigma = \frac{1}{\|B\|}$ , and in the second one we choose  $\tau = 0.01$  and  $\sigma = \frac{1}{\|B\|^2 \tau}$  as suggested in [3], and it works better than  $\tau = \frac{1}{\|B\|}$ . We name these variants by CP and CP-0.01, respectively.
- For ADMM, we tune different penalty parameters and arrive at  $\rho = 10$  that works best in this experiment.

The result of two problem instances are plotted in Figure 4. Here, ADMM-1 and ADMM-10 stand for ADMM with  $\rho = 1$  and  $\rho = 10$ , respectively. CP and CP-0.01 are the first and second variants of Chambolle-Pock's method, respectively. ASGAR-rs is a restarting variant of ASGAR, and avg- stands for the relative objective residuals evaluated at the averaging sequence in Chambolle-Pock's method and ADMM. Note that the  $\mathcal{O}(\frac{1}{k})$ -rate of these two methods is proved for this averaging sequence.

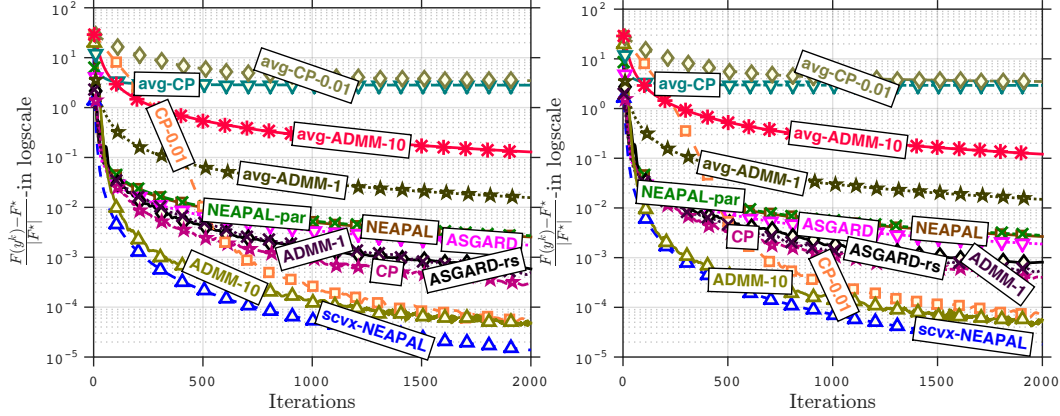

Figure 4: Convergence behavior of 9 algorithmic variants on two instances of (51) after 1000 iterations. Left: Without correlated columns; Right: With 50% correlated columns.

We can observe from Figure 4 that scvx-NEAPAL is the best. Both NEAPAL and NEAPAL-par have the same performance in this example and slightly slower than CP-0.01, ADMM-10 and ASGAR-rs. Note that ADMM requires to solve a linear system by PCG which is always slower than other methods including NEAPAL and NEAPAL-par. CP-0.01 works better than CP in late iterations but is slow in early iterations. ASGAR and ASGAR-rs remain comparable with CP-0.01. Since both Chambolle-Pock's method and ADMM have  $\mathcal{O}(\frac{1}{k})$ -convergence rate on the averaging sequence, we also evaluate the relative objective residuals and plot them in Figure 4. Clearly, this sequence shows its  $\mathcal{O}(\frac{1}{k})$ -rate but this rate is much slower than the last iterate sequence in all cases. It is also much slower than NEAPAL and NEAPAL-par, where both schemes have a theoretical guarantee.

## 5.2 Image compression using compressive sensing

In this last example, we consider the following constrained convex optimization model in compressive sensing of images:

$$\min_{Y \in \mathbb{R}^{p_1 \times p_2}} \left\{ f(Y) := \|\mathcal{D}Y\|_{2,1} \mid \mathcal{L}(Y) = b \right\}, \quad (52)$$

where  $\mathcal{D}$  is 2D discrete gradient operator representing a total variation (isotropic) norm,  $\mathcal{L} : \mathbb{R}^{p_1 \times p_2} \rightarrow \mathbb{R}^n$  is a linear operator obtained from a subsampled transformation scheme [2], and  $b \in \mathbb{R}^n$  is a compressive measurement vector [1]. Our goal is to recover a good image  $Y$  from a small amount of measurement  $b$  obtained via a model-based measurement operator  $\mathcal{L}$ . To fit into our template (1), we introduce  $x = \mathcal{D}Y$  to obtain two linear constraints  $\mathcal{L}(Y) = b$  and  $-x + \mathcal{D}Y = 0$ . In this case, the constrained reformulation of (52) becomes

$$F^* := \min_{x, Y} \left\{ F(z) := \|x\|_{2,1} \mid x - \mathcal{D}Y = 0, \mathcal{L}(Y) = b \right\},$$

where  $f(x) = \|x\|_{2,1}$ , and  $g(Y) = 0$ .

We now apply Algorithm 1 (NEAPAL), its parallel variant (NEAPAL-par), and Algorithm 2 (scvx-NEAPAL) to solve this problem and compare them with the CP method in [3] and ADMM [2]. We also compare our methods with a line-search variant Ls-CP of CP recently proposed in [3].

In CP and Ls-CP, we tune the step-size  $\tau$  and find that  $\tau = 0.01$  works well. The other parameters of Ls-CP are set as in the previous examples. For NEAPAL and NEAPAL-par, we use  $\rho_0 := 2\|\mathcal{B}\|^2$ . We also use  $\rho_0 := 10\|\mathcal{B}\|^2$  and call the variant of Algorithm 1 and its parallel scheme NEAPAL-v2 and NEAPAL-par-v2, respectively in this case. We set  $\mu_g := \frac{1}{2\|\mathcal{B}\|}$  in scvx-NEAPAL as a guess for

restricted strong convexity parameter. For the standard ADMM algorithm, we tune its penalty parameter and find that  $\rho := 20$  works best.

We test all the algorithms on 4 MRI images: MRI-of-knee, MRI-brain-tumor, MRI-hands, and MRI-wrist.<sup>3</sup> We follow the procedure in [2] to generate the samples using a sample rate of 25%. Then, the vector of measurements  $c$  is computed from  $c := \mathcal{L}(Y^\natural)$ , where  $Y^\natural$  is the original image.

Table 2: Performance and results of 8 algorithms on 4 MRI images

| Algorithms              | $f(Y^k)$ | $\frac{\ \mathcal{L}(Y^k) - b\ }{\ b\ }$ | Error     | PSNR  | Time[s] | $f(Y^k)$                    | $\frac{\ \mathcal{L}(Y^k) - b\ }{\ b\ }$ | Error     | PSNR  | Time[s] |
|-------------------------|----------|------------------------------------------|-----------|-------|---------|-----------------------------|------------------------------------------|-----------|-------|---------|
| MRI-knee (779 × 693)    |          |                                          |           |       |         | MRI-brain-tumor (630 × 611) |                                          |           |       |         |
| NEAPAL                  | 24.350   | 2.637e-02                                | 4.672e-02 | 83.93 | 80.15   | 36.101                      | 2.724e-02                                | 6.575e-02 | 79.50 | 53.77   |
| NEAPAL-par              | 24.335   | 2.539e-02                                | 4.676e-02 | 83.93 | 98.38   | 36.028                      | 2.738e-02                                | 6.595e-02 | 79.47 | 52.71   |
| NEAPAL-v2               | 28.862   | 7.125e-05                                | 4.143e-02 | 84.98 | 73.56   | 39.317                      | 5.226e-05                                | 6.310e-02 | 79.85 | 52.97   |
| NEAPAL-par-v2           | 29.183   | 7.247e-05                                | 4.007e-02 | 85.27 | 95.49   | 39.594                      | 5.338e-05                                | 6.258e-02 | 79.93 | 51.64   |
| scvx-NEAPAL             | 24.633   | 2.295e-02                                | 4.424e-02 | 84.41 | 87.96   | 36.783                      | 2.184e-02                                | 5.780e-02 | 80.62 | 65.12   |
| CP                      | 24.897   | 2.674e-02                                | 4.629e-02 | 84.01 | 101.22  | 37.745                      | 3.613e-02                                | 7.896e-02 | 77.91 | 63.71   |
| Ls-CP                   | 24.955   | 2.638e-02                                | 4.659e-02 | 83.96 | 106.11  | 38.139                      | 3.414e-02                                | 7.485e-02 | 78.37 | 66.12   |
| ADMM                    | 25.071   | 2.556e-02                                | 4.654e-02 | 83.97 | 902.79  | 38.941                      | 2.895e-02                                | 6.135e-02 | 80.10 | 655.81  |
| MRI-hands (1024 × 1024) |          |                                          |           |       |         | MRI-wrist (1024 × 1024)     |                                          |           |       |         |
| NEAPAL                  | 45.207   | 2.081e-02                                | 2.765e-02 | 91.37 | 146.41  | 29.459                      | 1.802e-02                                | 3.224e-02 | 90.04 | 152.51  |
| NEAPAL-par              | 45.207   | 2.081e-02                                | 2.765e-02 | 91.37 | 140.41  | 29.459                      | 1.802e-02                                | 3.224e-02 | 90.04 | 148.12  |
| NEAPAL-v2               | 48.679   | 7.336e-05                                | 2.074e-02 | 93.87 | 138.65  | 30.578                      | 8.516e-05                                | 2.572e-02 | 92.00 | 146.05  |
| NEAPAL-parallel-v2      | 48.858   | 7.483e-05                                | 2.008e-02 | 94.15 | 148.79  | 30.768                      | 8.766e-05                                | 2.473e-02 | 92.34 | 146.64  |
| scvx-NEAPAL             | 45.426   | 1.820e-02                                | 2.588e-02 | 91.95 | 154.35  | 29.403                      | 1.647e-02                                | 3.131e-02 | 90.29 | 157.35  |
| CP                      | 45.723   | 2.489e-02                                | 3.895e-02 | 88.40 | 159.74  | 30.052                      | 2.032e-02                                | 3.661e-02 | 88.93 | 165.58  |
| Ls-CP                   | 53.640   | 2.724e-02                                | 3.924e-02 | 88.33 | 162.94  | 39.396                      | 2.353e-02                                | 3.856e-02 | 88.48 | 168.29  |
| ADMM                    | 45.985   | 2.034e-02                                | 3.443e-02 | 89.47 | 1691.53 | 29.922                      | 1.825e-02                                | 3.686e-02 | 88.88 | 1503.56 |

The performance and results of these algorithms are summarized in Table 2, where  $f(Y^k) := \|\mathcal{D}Y^k\|_{2,1}$  is the objective value,  $\text{Error} := \frac{\|Y^k - Y^\natural\|_F}{\|Y^\natural\|_F}$  presents the relative error between the original image  $Y^\natural$  to the reconstruction  $Y^k$  after  $k = 300$  iterations.

We observe the following facts from the results of Table 2

- NEAPAL, NEAPAL-par, and scvx-NEAPAL are comparable with CP in terms of computational time, PSNR, objective values, and solution errors.
- NEAPAL-v2 and NEAPAL-par-v2 give better PSNR and solution errors, but have slightly worse objective value than the others.
- Ls-CP is slower than our methods due to additional computation.
- ADMM gives similar result in terms of the objective values, solution errors, and PSNR, but it is much slower than other methods due to the PCG inner loop.

## References

1. L. Baldassarre, Y.-H. Li, J. Scarlett, B. Gözcü, I. Bogunovic, and V. Cevher. Learning-based compressive subsampling. *IEEE Journal of Selected Topics in Signal Processing*, 10(4):809–822, 2016.
2. F. Knoll, C. Clason, C. Diwok, and R. Stollberger. Adapted random sampling patterns for accelerated MRI. *Magnetic resonance materials in physics, biology and medicine*, 24(1):43–50, 2011.
3. Y. Malitsky and T. Pock. A first-order primal-dual algorithm with linesearch. *SIAM J. Optim.*: 28(1), 411–432, 2018.

<sup>3</sup>These images are from <https://radiopaedia.org/cases/4090/studies/6567> and <https://www.nibib.nih.gov>
